# Supplementary material
Source: PubMed Central journal article supplement (PMC5401790)
Supplement: NIHMS829884-supplement-01.pdf [file NIHMS829884-supplement-01.pdf]

## SUPPLEMENTAL MATERIAL

(i) **Fasting serum C4** (sampled in the morning because of diurnal variation) measured by high-performance liquid chromatography with tandem mass spectrometry<sup>23</sup>, based on the method adapted from Gälman et al.<sup>24</sup> Serum 7 $\alpha$ -OH-4-cholesten-3-one (C4) is a downstream product of cytochrome P450 7A1 (CYP7A1), thus a surrogate for hepatic BA synthesis and a validated test for BAM. Increased serum C4 had a sensitivity of 90% and a specificity of 79% in diagnosing BAM, compared with the <sup>75</sup>seleno-homocholytaurine (SeHCA) whole body retention test<sup>25</sup>. It had 98% negative predictive value and 74% positive predictive value for diagnosis of BAM<sup>26</sup>, making the assay attractive as a screening test to rule out BAM. The lower limit of detection of serum C4 using this assay is 0.04ng/ml<sup>23</sup>. The upper limit of normal is 47.1ng/mL.

(ii) **Total and main fecal BA excretion** (per 48h on 100g fat diet) measured by high-performance liquid chromatography/tandem mass spectrometry<sup>5, 11</sup>, an assay adapted from a BA quantification method in human plasma<sup>27</sup>. The extraction, analysis and analytical performance of this test have been documented<sup>5</sup>. Each of the individual main BAs (CA, CDCA, DCA and LCA) has 0.06 $\mu$ mol (in methanol extract) as lower limit of detection. The 90<sup>th</sup> percentile for total fecal BA excretion in healthy volunteers is 2337 $\mu$ moles/48h<sup>10</sup>.

(iii) **Fecal fat** per 24h was measured at Mayo Clinic's Department of Laboratory Medicine using nuclear magnetic resonance spectrometry. Normal fecal fat was 2-7g per 24h.

(iv) Total **fecal weight** per 48h was obtained by weighing of the whole 48h stool collections.

(v) **Overall CT by scintigraphy [geometric center (GC)] at 24 (GC24) and 48 hours (GC48)**. The precise procedure and performance characteristics of the measurement of colonic transit by scintigraphy<sup>28</sup>, as well as responsiveness to pharmacological effects of medications<sup>19, 20</sup> have been extensively described.
